# Supplementary material for: Examination of a novel dietary fiber formulation on morphology and nutritional physiology of young male Sprague-Dawley rats fed a high fat diet
Source: PeerJ. 2025 Feb 20;13:e19029. doi: 10.7717/peerj.19029 (PMC11847487; doi:10.7717/peerj.19029)
Supplement: Supplemental Information 2 [file peerj-13-19029-s002.xlsx]

## Sheet: Fiber Complex Study
Diet	Animal number	Body Mass (g) at Week 0 (baseline)	Body Mass (g) at Week 1	Body Mass (g) at Week 2	Body Mass (g) at Week 3	Body Mass (g) at Week 4	Body Mass (g) at Week 5	Body Mass (g) at Week 6, Regular Collection	Body Mass (g) at Week 6, Morning of Surgery	Abdominal Circumference (cm) at Week 6	Nasoanal Length (cm) at Week 6	Tail Length (cm) at Week 6	Epididymal Fat mass (g) at Week 6	Epididymal Fat mass normalized to BM	Liver Mass (g) at Week 6	Liver Normalized to BM	Heart Mass (g) at Week 6	Heart Norm to BM	Whole blood glucose (mg/dl) at Week 3	Whole blood glucose (mg/dl) at Week 6	Plasma TBARS (nM/mL) at Week 6	Liver Triglycerides (mg/dL) at Week 6	Whole Blood HDL at Week 6	Whole Blood Triglycerides (mg/dL) at Week 6	Plasma Total Triglycerides (mg/dL) at Week 6	Plasma True Triglycerides (mg/dL) at Week 6	Plasma Free Glycerol (mg/dL) at Week 6	Plasma Beta-hydroxybutyrate (mM) at Week 6
Chow	1	156	191.8	232.5	263.3	276.7	293.4	309.3	306.8	15.4	21.6	20.1	2.9602	0.00964863	12.0745	0.0393563	1.0006	0.00326141	82	82	9.24334	0.07064	53	71	23.5976	16.8087	6.78896	0.159289
Chow	2	162	208.1	253.6	294.4	312.7	336.5	356.8	356.4	15.8	21.8	21.3	2.8341	0.00795202	14.21	0.0398709	1.1519	0.00323204	100	103	--	0.0756545	53	63	32.1404	25.3514	6.78896	0.233548
Chow	3	156	196.5	244.6	269.9	287.9	312.5	334.6	329.3	15.4	22.1	20.3	3.5193	0.0106872	13.6644	0.0414953	1.0005	0.00303826	94	98	7.97215	0.0922246	54	73	107.601	93.6333	13.9679	0.108972
Chow	4	149	198.7	237.2	267.3	281	292.5	306.5	306.5	16	20.5	20.5	2.4341	0.0079416	11.5553	0.0377008	1.0202	0.00332855	100	119	7.79056	0.0973469	50	62	44.1613	37.3723	6.78896	0.201491
Chow	5	147	185.4	227.3	251.5	264.5	275	284.3	282.1	14	21.1	18.9	2.3161	0.00821021	9.2961	0.0329532	0.9325	0.00330557	110	105	6.88257	0.070827	54	87	21.9636	16.5325	5.43117	0.324241
Chow	6	141.4	189.4	239.2	272.9	285.7	303.4	320.1	317.7	15.4	21.4	20.2	2.5457	0.00801291	11.0073	0.0346468	1.0668	0.00335788	102	126	8.69855	0.0991454	57	66	59.006	47.5586	11.4473	0.177752
Chow	7	155.9	195	237.9	265.3	280.7	298	314.4	307.7	14.9	21.3	19.8	2.3039	0.00748749	12.15	0.0394865	1.157	0.00376016	80	92	5.24818	0.0658482	57	88	32.3506	25.3666	6.98397	0.307198
Chow	8	156.9	198.4	238	266.1	282	293.7	308.1	306.3	15.4	20.5	20.4	3.0304	0.00989357	12.8117	0.0418273	1.0433	0.00340614	107	114	5.06659	0.0848895	67	82	43.1103	35.9349	7.17536	0.181201
	Mean	153.025	195.412	238.788	268.838	283.9	300.625	316.762	314.1	15.2875	21.2875	20.1875	2.74297	0.0087292	12.0962	0.0384171	1.0466	0.00333625	96.875	104.875	7.2717	0.082072	55.625	74	45.4914	37.3198	8.17158	0.211712
	s.d.	6.64589	6.88174	7.82659	12.099	13.6232	17.9898	21.4734	21.614	0.61281	0.574301	0.677047	0.422596	0.00117008	1.54742	0.00315835	0.0771382	0.000203998	10.921	14.4858	1.62233	0.0130787	5.12522	10.4745	27.8556	25.1194	2.92711	0.0734357
	n	8	8	8	8	8	8	8	8	8	8	8	8	8	8	8	8	8	8	8	7	8	8	8	8	8	8	8
	s.e.m.	2.34968	2.43306	2.76712	4.27764	4.81653	6.36036	7.59201	7.64169	0.216661	0.203046	0.239372	0.14941	0.000413684	0.547095	0.00111664	0.0272725	7.21242e-05	3.86115	5.12151	0.613182	0.00462403	1.81204	3.70328	9.84844	8.88106	1.03489	0.0259634
High fat diet	1	153	192.7	239.1	268	285.1	311.7	333.1	338	16	21.5	20.5	4.661	0.0137899	11.7532	0.0347728	1.1285	0.00333876	137	135	6.33777	0.18366	61	76	71.5861	62.2765	9.30955	0.263779
High fat diet	2	161	196.2	245.5	279.1	298.4	329	350.2	352.9	16.2	21.8	21.5	5.3011	0.0150215	12.5708	0.0356214	1.1741	0.003327	137	169	--	0.139915	53	71	64.4909	52.2708	12.2201	0.241664
High fat diet	3	156.2	193.5	240	269.6	294.2	315.6	336.2	330.6	15.8	21.6	19.2	3.9007	0.0117989	9.2965	0.0281201	1.1281	0.00341228	129	112.5	10.3329	0.150794	62	67	57.1856	44.9618	12.2237	0.323632
High fat diet	4	153.5	197.2	247.4	275.9	295.4	307.8	326.7	327.5	15.3	22	20.1	4.5664	0.0139432	11.0612	0.0337747	1.124	0.00343206	124	121	6.88257	0.162344	50	74	47.3817	37.2957	10.0859	0.400123
High fat diet	5	155.8	200.4	245.4	273.8	293.5	312.9	332.1	328.5	14.5	22	20.1	4.0098	0.0122064	10.3422	0.0314831	1.2046	0.00366697	130	122	8.88015	0.18216	63	53	75.671	61.5117	14.1593	0.406819
High fat diet	6	151.1	193.7	223.8	248.7	261.5	276.7	292.1	296.5	15.6	20.6	19.6	3.4862	0.0117578	9.3755	0.0316206	1.0612	0.00357909	123	106	6.33777	0.103474	71	58	71.2133	59.1881	12.0251	0.161115
High fat diet	7	154.2	186.3	220	242.5	257.7	273.8	291.5	288.3	15	20.8	20.2	3.4813	0.0120753	9.6897	0.0336098	1.0602	0.00367742	148	107	4.70339	0.136362	59	70	37.6253	32.7755	4.84978	0.174912
High fat diet	8	165.2	199.3	237.8	265.7	284.2	306.4	326.5	325.8	16	21.1	20.8	6.1781	0.0189629	11.123	0.0341406	1.0387	0.00318815	143	103	6.88257	0.189634	71	76	51.8632	43.5215	8.34176	0.36482
	Mean	156.25	194.912	237.375	265.412	283.75	304.238	323.55	323.513	15.55	21.425	20.25	4.44808	0.0136945	10.6515	0.0328929	1.11493	0.00345272	133.875	121.938	7.19388	0.156043	61.25	68.125	59.6271	49.2252	10.4019	0.292108
	s.d.	4.65557	4.45275	10.192	13.0728	15.7221	19.1801	20.9403	21.1773	0.58064	0.536523	0.707107	0.935913	0.00244272	1.18156	0.00239681	0.0581561	0.000174525	8.91928	21.7493	1.8511	0.0294021	7.49762	8.47581	13.4089	11.2976	2.92139	0.0966199
	n	8	8	8	8	8	8	8	8	8	8	8	8	8	8	8	8	8	8	8	7	8	8	8	8	8	8	8
	s.e.m.	1.64599	1.57428	3.60341	4.62194	5.55862	6.7812	7.40352	7.48731	0.205287	0.18969	0.25	0.330895	0.000863631	0.417744	0.000847402	0.0205613	6.17039e-05	3.15344	7.68953	0.699649	0.0103952	2.65081	2.99665	4.74076	3.99429	1.03287	0.0341603
High fat diet + Fiber Complex	1	157	192.5	239.7	273.1	294.6	312.7	328.3	327.4	14.9	21	21	4.2042	0.0128412	11.6106	0.035463	1.0127	0.00309316	147	127	6.51937	0.215603	55	89	43.5307	35.7739	7.75675	0.25891
High fat diet + Fiber Complex	2	147	190.1	239.2	279.8	301.6	324.1	346.7	344.2	16.5	22.1	21.6	4.5681	0.0132716	12.0312	0.0349541	1.2661	0.00367838	146	160	--	--	59	50	61.8297	46.699	15.1307	0.186071
High fat diet + Fiber Complex	3	153.3	197.1	230	251.3	266.8	278	294.9	299	14.7	20.8	19.2	4.1644	0.0139278	9.5506	0.0319418	0.934	0.00312375	137	133	9.06174	0.141834	65	75	101.486	81.1188	20.3669	0.309227
High fat diet + Fiber Complex	4	157.9	208.5	252.6	284.1	306.6	325.4	344.6	350.5	15.7	21.9	20.1	4.1833	0.0119352	10.8285	0.0308944	1.1773	0.00335892	157	142	7.97215	0.182455	68	88	30.5064	24.2988	6.20757	0.432789
High fat diet + Fiber Complex	5	156.5	195	231.5	258.1	274.3	297	315	310	15.4	20.8	20.3	4.1228	0.0132994	10.1874	0.0328626	1.0585	0.00341452	124	128	6.88257	0.120673	55	52	36.8321	29.2668	7.56536	0.205143
High fat diet + Fiber Complex	6	163.5	193.2	223.3	254	266.9	291.9	306.8	303.9	16	21.1	20	3.4547	0.0113679	10.2011	0.0335673	1.0698	0.00352024	145	127	5.24818	0.117501	56	68	69.1589	58.8779	10.2809	0.18039
High fat diet + Fiber Complex	7	165	199.2	246.5	285.7	313.4	341	362.4	357.8	16.2	21.4	21.4	--	--	12.1041	0.0338292	1.375	0.00384293	95.5	122	3.977	0.114613	70	61	40.2865	33.3025	6.98397	0.314502
High fat diet + Fiber Complex	8	151.6	191.2	240.5	278.5	308.6	336.5	357.7	356.3	15.8	21.6	20.7	7.4313	0.0208569	12.0357	0.0337797	1.3118	0.00368173	131	97	2.34261	0.122868	47	85	42.1069	38.8099	3.29698	0.233548
	Mean	156.475	195.85	237.912	270.575	291.6	313.325	332.05	331.138	15.65	21.3375	20.5375	4.58983	0.0139286	11.0686	0.0334115	1.15065	0.0034642	135.312	129.5	6.00052	0.145078	59.375	71	53.2171	43.5185	9.69865	0.265072
	s.d.	5.95165	5.93368	9.39809	13.9788	19.3563	22.4839	24.7086	24.2753	0.621059	0.495516	0.796308	1.29589	0.00317652	1.00846	0.00149856	0.15645	0.0002691	19.0843	17.8326	2.32187	0.0390702	7.76324	15.748	23.3816	18.5889	5.50997	0.0849853
	n	8	8	8	8	8	8	8	8	8	8	8	7	7	8	8	8	8	8	8	7	7	8	8	8	8	8	8
	s.e.m.	2.10423	2.09787	3.32273	4.94226	6.84348	7.94925	8.73583	8.58262	0.219578	0.175191	0.281538	0.489801	0.00120061	0.356545	0.000529819	0.0553135	9.51412e-05	6.74731	6.30476	0.877585	0.0147671	2.74472	5.56776	8.26663	6.57217	1.94807	0.0300468
